**Figure 1**

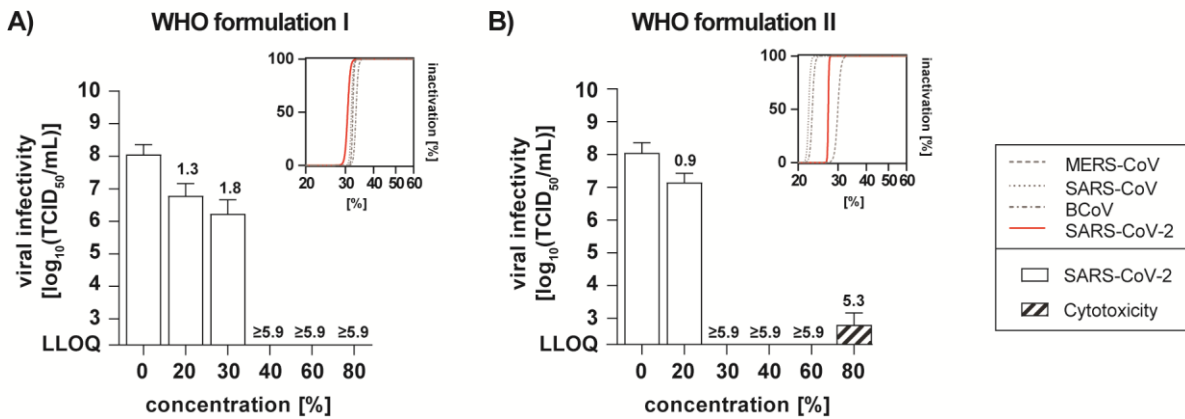

**Figure 1**

**Virucidal activity of WHO formulations I (85 % ethanol) and II (75 % 2-propanol) against SARS-CoV-2.** WHO formulations I (A) and II (B) were tested for their efficacy in inactivating SARS-CoV-2. The concentrations of the WHO formulations ranged from 0 % to 80 % with an exposure time of 30 seconds. Viral titers are displayed as 50 % tissue culture infectious dose 50 (TCID<sub>50</sub>/mL) values. Cytotoxic effects are displayed as dashed bars and were calculated analogous to virus infectivity. RFs are included above the bar. The mean of two - three independent experiments with standard deviation are shown. LLOQ: lower limit of quantification. Top inserts: Regression analysis of the inactivation of SARS-CoV-2, bovine CoV (BCoV), SARS-CoV and MERS-CoV by WHO formulation I (A) and II (B). Depicted is the percentage of inactivation at different concentrations.

Figure 2

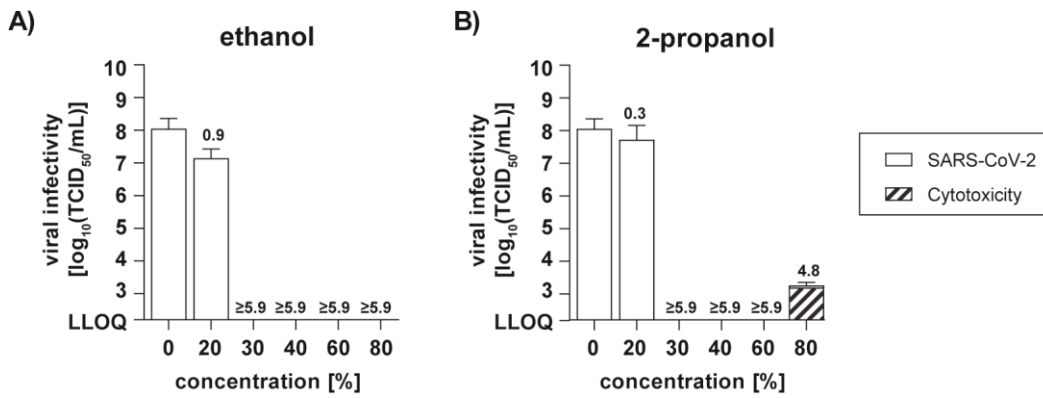

Figure 2

**Effect of alcohols on SARS-CoV-2.** Commercially available ethanol (A), or 2-propanol (B) were tested for their efficacy in inactivating SARS-CoV-2. The biocide concentrations ranged from 0 % to 80 % with an exposure time of 30 seconds. Viral titers are displayed as 50 % tissue culture infectious dose 50 (TCID<sub>50</sub>/mL) values. Cytotoxic effects are displayed as dashed bars and were calculated analogous to virus infectivity. LLOQ: lower limit of quantification. RFs are included above the bar. Dashed line: limit of detection. The mean of two - three independent experiments with standard deviation are shown.

1 **Efficient inactivation of SARS-CoV-2 by WHO-recommended hand rub**  
2 **formulations and alcohols**

3 Annika Kratzel<sup>1,2,3</sup>, Daniel Todt<sup>4</sup>, Philip V`kovski<sup>1,2</sup>, Silvio Steiner<sup>1,2,3</sup>, Mitra L.  
4 Gultom<sup>1,2,3</sup>, Tran Thi Nhu Thao<sup>1,2,3</sup>, Nadine Ebert<sup>1,2</sup>, Melle Holwerda<sup>1,2,3,7</sup>, Jörg  
5 Steinmann<sup>5,6</sup>, Daniela Niemeyer<sup>9</sup>, Ronald Dijkman<sup>1,2,7</sup>, Günter Kampf<sup>8</sup>, Christian  
6 Drosten<sup>9</sup>, Eike Steinmann<sup>4</sup>, Volker Thiel<sup>1,2</sup>, and Stephanie Pfaender<sup>4</sup>

7

8 <sup>1</sup>Institute of Virology and Immunology, Bern and Mittelhäusern, Switzerland

9 <sup>2</sup>Department of Infectious Diseases and Pathobiology, Vetsuisse Faculty, University of  
10 Bern, Bern, Switzerland

11 <sup>3</sup>Graduate School for Cellular and Biomedical Sciences, University of Bern, Bern,  
12 Switzerland

13 <sup>4</sup>Department for Molecular & Medical Virology, Ruhr-Universität Bochum, Germany

14 <sup>5</sup>Institute of Medical Microbiology, University Hospital of Essen, Essen, Germany

15 <sup>6</sup>Institute of Clinical Hygiene, Medical Microbiology and Infectiology, General  
16 Hospital Nürnberg, Paracelsus Medical University, Nuremberg, Germany

17 <sup>7</sup>Institute for Infectious Diseases, University of Bern, Bern, Switzerland

18 <sup>8</sup>University Medicine Greifswald, Institute for Hygiene and Environmental Medicine,  
19 Greifswald, Germany

20 <sup>9</sup>Institute of Virology, Charité Berlin, Berlin, Germany

21

22

1 Running title: Inactivation of SARS-CoV-2 by WHO formulations and alcohols

2 Keywords: SARS-CoV-2, COVID-19, coronavirus, WHO, ethanol, 2-propanol, hand

3 rub disinfectant

4

5 **#Address for correspondence**

6 Prof. Dr. rer. nat. Stephanie Pfänder

7 Department for Molecular & Medical Virology

8 Ruhr-Universität Bochum

9 Universitätsstrasse 150

10 44801 Bochum

11 Germany

12 Email: [stephanie.pfaender@ruhr-uni-bochum.de](mailto:stephanie.pfaender@ruhr-uni-bochum.de)

13 Phone: +49 234 32 29278

14

15 **Financial support**

16 This study was supported by the European Commission (Marie Skłodowska-Curie

17 Innovative Training Network “HONOURS”; grant agreement No 721367), and by the

18 Federal Ministry of Education and Research, Germany (BMBF; grant RAPID,

19 #01KI1723A).

20

21 Conflict of interest: The authors do not have a conflict of interest.

22 Number of figures and tables: 2

23 Word count Abstract: 109

24 Word count text: 873

25

## 1 **Abstract**

2 The recent emergence of Severe acute respiratory syndrome coronavirus 2 (SARS-  
3 CoV-2) causing COVID-19 is a major burden for health care systems worldwide. It is  
4 important to address if the current infection control instructions based on active  
5 ingredients are sufficient. We therefore determined the virucidal activity of two  
6 alcohol-based hand rub solutions for hand disinfection recommended by the World  
7 Health Organization (WHO), as well as commercially available alcohols. Efficient  
8 SARS-CoV-2 inactivation was demonstrated for all tested alcohol-based disinfectants.  
9 These findings show the successful inactivation of SARS-CoV-2 for the first time and  
10 provide confidence in its use for the control of COVID-19.

11

## 12 **Importance**

13 The current COVID-19 outbreak puts a huge burden on the world's health care  
14 systems. Without effective therapeutics or vaccines being available, effective hygiene  
15 measure are of utmost importance to prevent viral spreading. It is therefore crucial to  
16 evaluate current infection control strategies against SARS-CoV-2. We show the  
17 inactivation of the novel coronavirus for the first time and endorse the importance of  
18 disinfectant-based hand hygiene to reduce SARS-CoV-2 transmission.

19

## 20 **Introduction**

21 SARS-CoV-2 is the third highly pathogenic human CoV to have crossed the species  
22 barrier into humans during the last 20 years<sup>1,2,3</sup>. SARS-CoV-2 infection is associated  
23 with coronavirus disease 2019 (COVID-19) which is characterized by severe  
24 respiratory distress, fever and cough, leading to a high percentage of fatalities,

1 especially in the elderly or patients with comorbidities<sup>4</sup>. As of March 6<sup>th</sup> 2020 there are  
2 101604 globally confirmed cases and related 3460 deaths<sup>5</sup>. Health care experts suspect  
3 that a global pandemic is inevitable mainly because human-to-human transmission of  
4 SARS-CoV-2 is very efficient and infected individuals can transmit the virus without  
5 or with only mild symptoms<sup>4</sup>. Given that so far, no therapeutics or vaccines are  
6 available, virus containment and prevention of infection are of highest priority.  
7 Effective hand hygiene is crucial to limit virus spread. Therefore, easily available but  
8 efficient disinfectants are crucial. The World Health Organization's 'Guidelines for  
9 Hand Hygiene in Health Care' suggests two alcohol-based formulations for hand  
10 sanitization to reduce pathogen infectivity and spreading. These recommendations are  
11 based on fast-acting and broad-spectrum of microbicidal activity, as well as easy  
12 accessibility and safety<sup>3</sup>. We have previously shown that WHO formulation I and II  
13 were able to inactivate the closely related SARS-CoV and MERS-CoV<sup>6</sup>. So far,  
14 recommendations to inactivate SARS-CoV-2 were only translated from findings with  
15 other coronaviruses<sup>7</sup>. To evaluate if alcohol-based disinfectants are also efficient for  
16 the inactivation of SARS-CoV-2, we tested different concentrations of WHO  
17 formulation I and II, as well as the alcohols ethanol and 2-propanol for their virucidal  
18 activity.

19

## 20 **Results**

21 SARS-CoV-2 was highly susceptible to the WHO formulations (**Fig. 1**). WHO  
22 formulation I, based on 85 % ethanol, efficiently inactivated the virus with reduction  
23 factors (RFs) of  $\leq 5.9$  and concentrations between 40 % – 80 % (**Fig. 1A**). Subsequent  
24 regression analysis revealed similar inactivation profiles compared to SARS-CoV,

1 MERS-CoV and bovine CoV (BCoV), which is often used as surrogate for highly  
2 pathogenic human CoVs (**Fig. 1A**). WHO formulation II, which is based on 75 %  
3 isopropanol, demonstrated a better virucidal effect at low concentrations, with  
4 complete viral inactivation and RFs of  $\leq 5$  at a minimal concentration of 30 % (**Fig.**  
5 **1B**). The regression analysis showed an inactivation profile of SARS-CoV-2, which  
6 was in between SARS-CoV, BCoV and MERS-CoV (**Fig. 1B**).

7 Next, we addressed the susceptibility of SARS-CoV-2 against the individual  
8 components of the WHO recommended formulations which are also the main  
9 ingredients of commercially available hand disinfections. Both alcohols, ethanol (**Fig.**  
10 **2A**) and 2-propanol (**Fig. 2B**) were able to reduce viral titers in 30 s exposure to  
11 background levels with RFs between  $\leq 4.8$  and 5.9 after 30 sec. Furthermore, we could  
12 show that a minimal concentration of 30 % ethanol or 2-propanol is sufficient for viral  
13 inactivation (**Fig. 2**).

14

## 15 **Discussions**

16 This study shows that SARS-CoV-2 can be efficiently inactivated by both WHO  
17 formulations implicating their use in health care systems and viral outbreak situations.  
18 Notably, both tested alcohols, ethanol and 2-propanol were efficient in inactivating the  
19 virus in 30 s at a minimal final concentration of at least 30 %. Alcohol constitutes the  
20 basis for many hand rubs routinely used in health care settings. Our findings are  
21 therefore of utmost importance in the current outbreak situation to minimize viral  
22 transmission and maximize virus inactivation.

23

## 24 **Material and Methods**

## 1 **Viral strains and cell culture**

2 SARS-CoV-2 (SARS-CoV-2/München-1.1/2020/929) stocks were propagated on  
3 VeroE6 cells (kindly provided by M- Müller/ C. Drosten, Charité, Berlin, Germany).  
4 VeroE6 cells were cultured in Dulbecco's modified minimal essential medium (Gibco)  
5 supplemented with 10 % heat inactivated fetal bovine serum (Gibco), 1 % non-  
6 essential amino acids (Gibco), 100 µg/mL Streptomycin and 100 IU/mL Penicillin  
7 (Gibco) and 15 mM HEPES (Gibco).

## 8 **Chemicals**

9 WHO I formulation consists of 85 % ethanol (v/v), 0.725 % glycerol (v/v) and 0.125 %  
10 hydrogen peroxide (v/v). The isopropyl-based formulation, WHO II, contains 75 %  
11 isopropanol (w/w), 0.725 % glycerol (v/v) and 0.125 % hydrogen peroxide (v/v)<sup>8</sup>. In  
12 addition, ethanol (CAS 64-17-5), and 2-propanol (CAS 67-63-0) were investigated.

## 13 **Quantitative Suspension Test and Virus Titration**

14 Virucidal activity studies were performed with a quantitative suspension test with 30  
15 seconds exposure time<sup>3</sup>. Briefly, one part virus suspension was mixed with one part  
16 organic load (0.3 % bovine serum albumin [BSA] as interfering substance) and eight  
17 parts disinfection solution of different concentrations. Following 30 seconds exposure,  
18 samples were serially diluted and the TCID<sub>50</sub>/mL values were determined by crystal  
19 violet staining and subsequent scoring the amounts of wells displaying cytopathic  
20 effects. TCID<sub>50</sub> is calculated by the Spearman & Kärber algorithm as described<sup>9</sup>.  
21 Cytotoxic effects of disinfectants were monitored by crystal violet staining and optical  
22 analysis for altered density and morphology of the cellular monolayer in the absence of  
23 virus and were quantified analogous to the TCID<sub>50</sub>/mL of the virus infectivity.

## 24 **Statistical Analysis**



1 Dose-response curves (normalized virus inactivation [%] vs. log (disinfectant  
2 concentration [%]) were determined using nonlinear regression using the robust fitting  
3 method on the normalized 50 % tissue culture infectious dose (TCID<sub>50</sub>) data  
4 implemented in GraphPad Prism version 8.0.3 for Windows. Reference curves for  
5 SARS-CoV, MERS-CoV and BCoV were plotted based on previously published data<sup>6</sup>.  
6 The mean TCID<sub>50</sub> and standard deviations of means were assessed from 2-3 individual  
7 experiments. Outlier were identified using Grubb's test (GraphPad Prism). Reduction  
8 factors (RF) for each treatment condition were calculated as follows:

$$RF = treatment - control = \log_{10} \left( \frac{\sum_{i=1}^n x_i}{n} \right) - \log_{10} \left( \frac{\sum_{j=1}^m x_j}{m} \right)$$

9

10

11

1 **Acknowledgments.**

2 We would like to thank all members of Institute of Virology and Immunology, Bern  
3 and the Department for Molecular & Medical Virology for helpful suggestions and  
4 discussions.

5

1 **Figure legends**

2 **Figure 1**

3 **Virucidal activity of WHO formulations I (85 % ethanol) and II (75 % 2-**  
4 **propanol) against SARS-CoV-2.** WHO formulations I (A) and II (B) were tested for  
5 their efficacy in inactivating SARS-CoV-2. The concentrations of the WHO  
6 formulations ranged from 0 % to 80 % with an exposure time of 30 seconds. Viral  
7 titers are displayed as 50 % tissue culture infectious dose 50 (TCID<sub>50</sub>/mL) values.  
8 Cytotoxic effects are displayed as dashed bars are and were calculated analogous to  
9 virus infectivity. RFs are included above the bar. The mean of two - three independent  
10 experiments with standard deviation are shown. LLOQ: lower limit of quantification.  
11 Top inserts: Regression analysis of the inactivation of SARS-CoV-2, bovine CoV  
12 (BCoV), SARS-CoV and MERS-CoV by WHO formulation I (A) and II (B). Depicted  
13 is the percentage of inactivation at different concentrations.

14

15 **Figure 2**

16 **Effect of alcohols on SARS-CoV-2.** Commercially available ethanol (A), or 2-  
17 propanol (B) were tested for their efficacy in inactivating SARS-CoV-2. The biocide  
18 concentrations ranged from 0 % to 80 % with an exposure time of 30 seconds. Viral  
19 titers are displayed as 50 % tissue culture infectious dose 50 (TCID<sub>50</sub>/mL) values.  
20 Cytotoxic effects are displayed as dashed bars are and were calculated analogous to  
21 virus infectivity. LLOQ: lower limit of quantification. RFs are included above the bar.  
22 Dashed line: limit of detection. The mean of two - three independent experiments with  
23 standard deviation are shown.

24

## 1     **References**

- 2     1.     Drosten C, Günther S, Preiser W, et al. Identification of a novel coronavirus in  
3           patients with severe acute respiratory syndrome. *N Engl J Med*.  
4           2003;348(20):1967-1976. doi:10.1056/NEJMoa030747
- 5     2.     Zaki AM, van Boheemen S, Bestebroer TM, Osterhaus ADME, Fouchier RAM.  
6           Isolation of a Novel Coronavirus from a Man with Pneumonia in Saudi Arabia.  
7           *N Engl J Med*. 2012;367(19):1814-1820. doi:10.1056/NEJMoa1211721
- 8     3.     WHO(b). WHO Guidelines on Hand Hygiene in Health Care. *World Health*.  
9           2009;30(1):270. doi:10.1086/600379
- 10    4.     Lai C-C, Shih T-P, Ko W-C, Tang H-J, Hsueh P-R. Severe acute respiratory  
11           syndrome coronavirus 2 (SARS-CoV-2) and coronavirus disease-2019 (COVID-  
12           19): The epidemic and the challenges. *Int J Antimicrob Agents*. 2020:105924.  
13           doi:10.1016/j.ijantimicag.2020.105924
- 14    5.     CSSE Johns Hopkins. Coronavirus COVID-19 Global Cases.
- 15    6.     Siddharta A, Pfaender S, Vielle NJ, et al. Virucidal activity of world health  
16           organization-recommended formulations against enveloped viruses, including  
17           zika, ebola, and emerging coronaviruses. *J Infect Dis*. 2017;215(6):902-906.  
18           doi:10.1093/infdis/jix046
- 19    7.     Kampf G, Todt D, Pfaender S, Steinmann E. Persistence of coronaviruses on  
20           inanimate surfaces and its inactivation with biocidal agents. *J Hosp Infect*. 2020.  
21           doi:10.1016/j.jhin.2020.01.022
- 22    8.     Becker B, Brill FHH, Todt D, et al. Virucidal efficacy of peracetic acid for  
23           instrument disinfection. *Antimicrob Resist Infect Control*. 2017;6(1).  
24           doi:10.1186/s13756-017-0271-3

- 1 9. Places G, Hierholzer JC, Killington RA. Cell Culture Cell Culture. *Virol*
- 2 *Methods Man.* 1996;76(1):2-6. doi:10.1016/B978-012465330-6/50003-8
- 3
